# Supplementary material for: Efficient band structure tuning, charge separation, and visible-light response in ZrS2-based van der Waals heterostructures
Source: Royal Society of Chemistry journal article supplement (doi:10.1039/c5ee03490f), 2015-12-03
Supplement: c5ee03490f1.pdf [file c5ee03490f1.pdf]

Electronic Supplementary Information

**Efficient band structure tuning, charge separation, visible-light  
response in ZrS<sub>2</sub>-based van der Waals heterostructures<sup>†</sup>**

Xirui Zhang,<sup>‡a</sup> Zhaoshun Meng,<sup>‡a</sup> Dewei Rao,<sup>bc</sup> Yunhui Wang,<sup>a</sup> Qi Shi,<sup>a</sup> Yuzhen Liu,<sup>a</sup>  
Haiping Wu,<sup>a</sup> Kaiming Deng,<sup>\*a</sup> Hongyang Liu<sup>\*b</sup> and Ruifeng Lu<sup>\*a</sup>

<sup>a</sup>Department of Applied Physics, Nanjing University of Science and Technology, Nanjing 210094, P R China

<sup>b</sup>Shenyang National Laboratory for Materials Science, Institute of Metal Research, Chinese Academy of Sciences, 72 Wenhua Road, Shenyang 110016, P R China

<sup>c</sup>Institute for Advanced Materials, Jiangsu University, Zhenjiang 212013, P R China

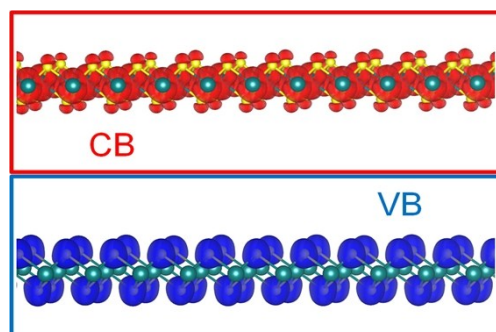

**Fig. S1** Charge distribution of pure ZrS<sub>2</sub> monolayer. The charge densities of the VB (blue) and CB (red) is plotted with an isovalue of 0.02 e/Å<sup>3</sup>.

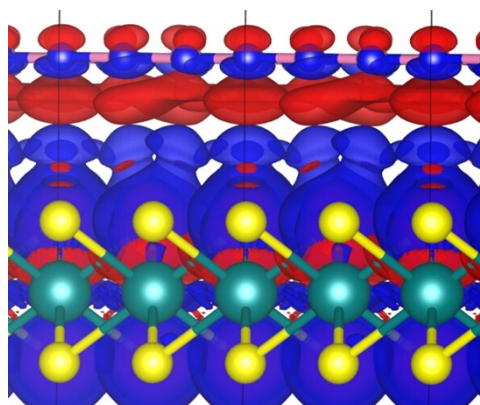

**Fig. S2** Charge density differences of hybrid h-BN/ZrS<sub>2</sub> heterostructure compared with the isolated ZrS<sub>2</sub> and graphene monolayers. Pink, blue, yellow and dark green balls represent B, N, S and Zr atoms, respectively. Blue and red isosurfaces represent, respectively, charge accumulation and depletion in the space. The iso-value chosen to plot the isosurfaces is 0.0001 e/Å<sup>3</sup>.

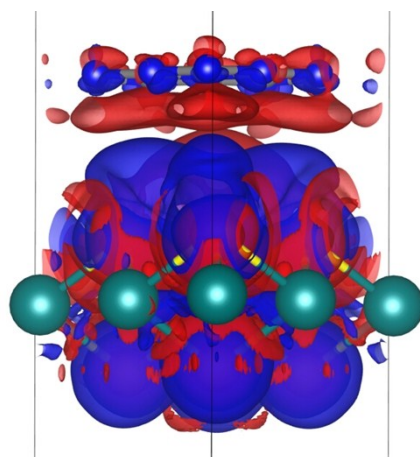

**Fig. S3** Charge density differences of hybrid g-C<sub>3</sub>N<sub>4</sub>/ZrS<sub>2</sub> heterostructure compared with the isolated ZrS<sub>2</sub> and graphene monolayers. Grey, blue, yellow and dark green balls represent C, N, S and Zr atoms, respectively. Blue and red isosurfaces represent, respectively, charge accumulation and depletion in the space. The isovalue chosen to plot the isosurfaces is 0.0001 e/Å<sup>3</sup>.

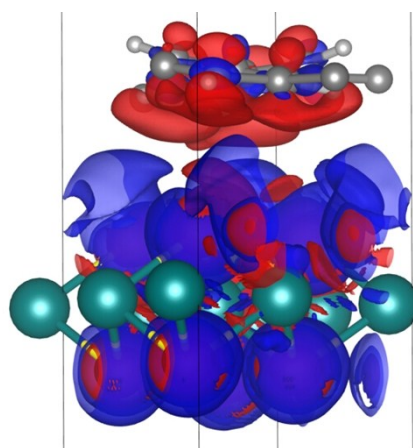

**Fig. S4** Charge density differences of hybrid PG/ZrS<sub>2</sub> heterostructure compared with the isolated ZrS<sub>2</sub> and graphene monolayers. Grey, white, yellow and dark green balls represent C, H, S and Zr atoms, respectively. Red and blue isosurfaces represent, respectively, charge accumulation and depletion in the space. The isovalue chosen to plot the isosurfaces is 0.0001 e/Å<sup>3</sup>.

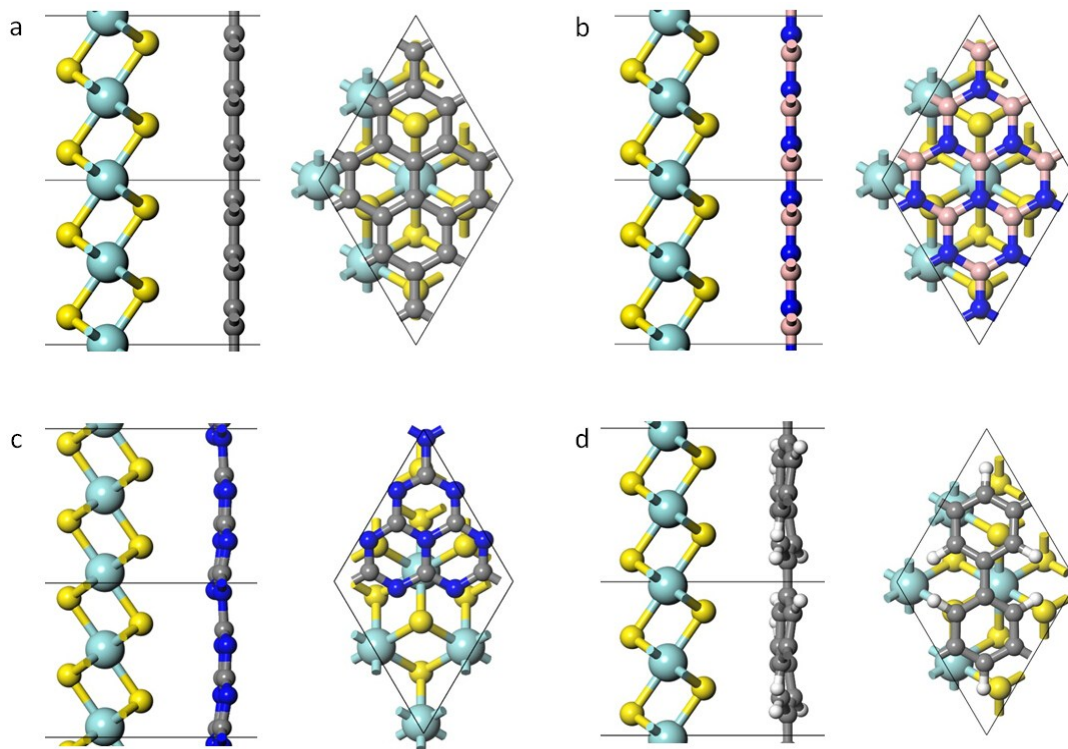

**Fig. S5** Fully relaxed structures. **(a)** Side view and top view of graphene/ZrS<sub>2</sub> heterostructure. **(b)** Side view and top view of h-BN/ZrS<sub>2</sub> heterostructure. **(c)** Side view and top view of g-C<sub>3</sub>N<sub>4</sub>/ZrS<sub>2</sub> heterostructure. **(d)** Side view and top view of PG/ZrS<sub>2</sub> heterostructure.
